# Supplementary material
Source: PubMed Central journal article supplement (PMC4893198)

# Figure S1

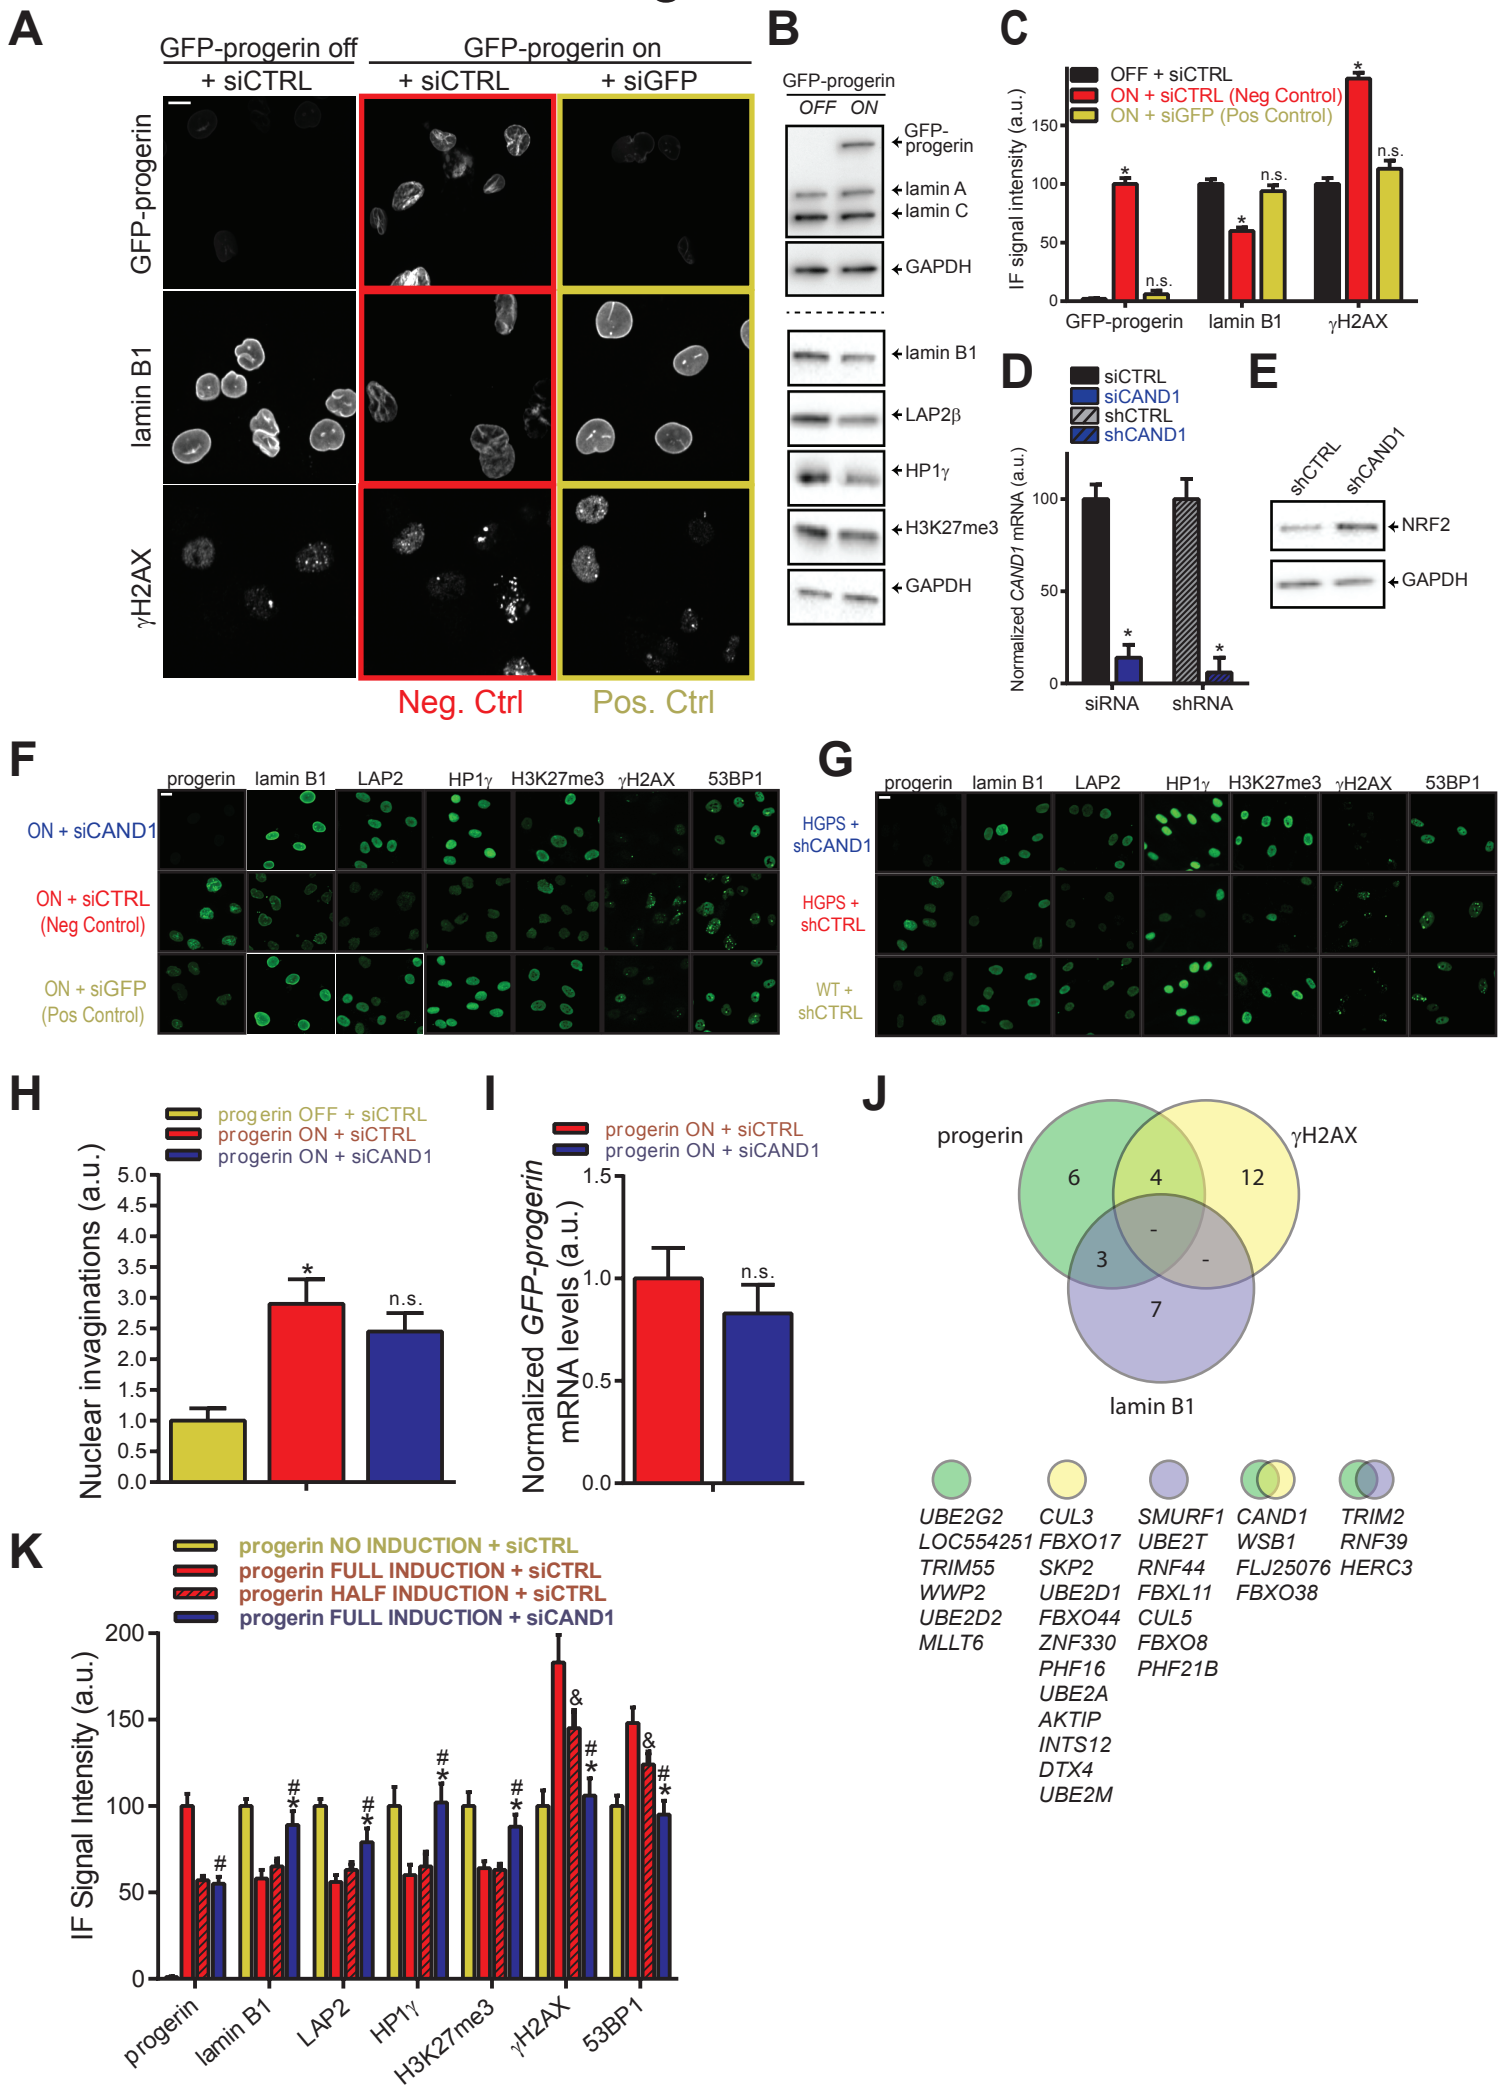

Supplement: NIHMS785613-supplement-1.pdf [file NIHMS785613-supplement-1.pdf]

# Figure S2

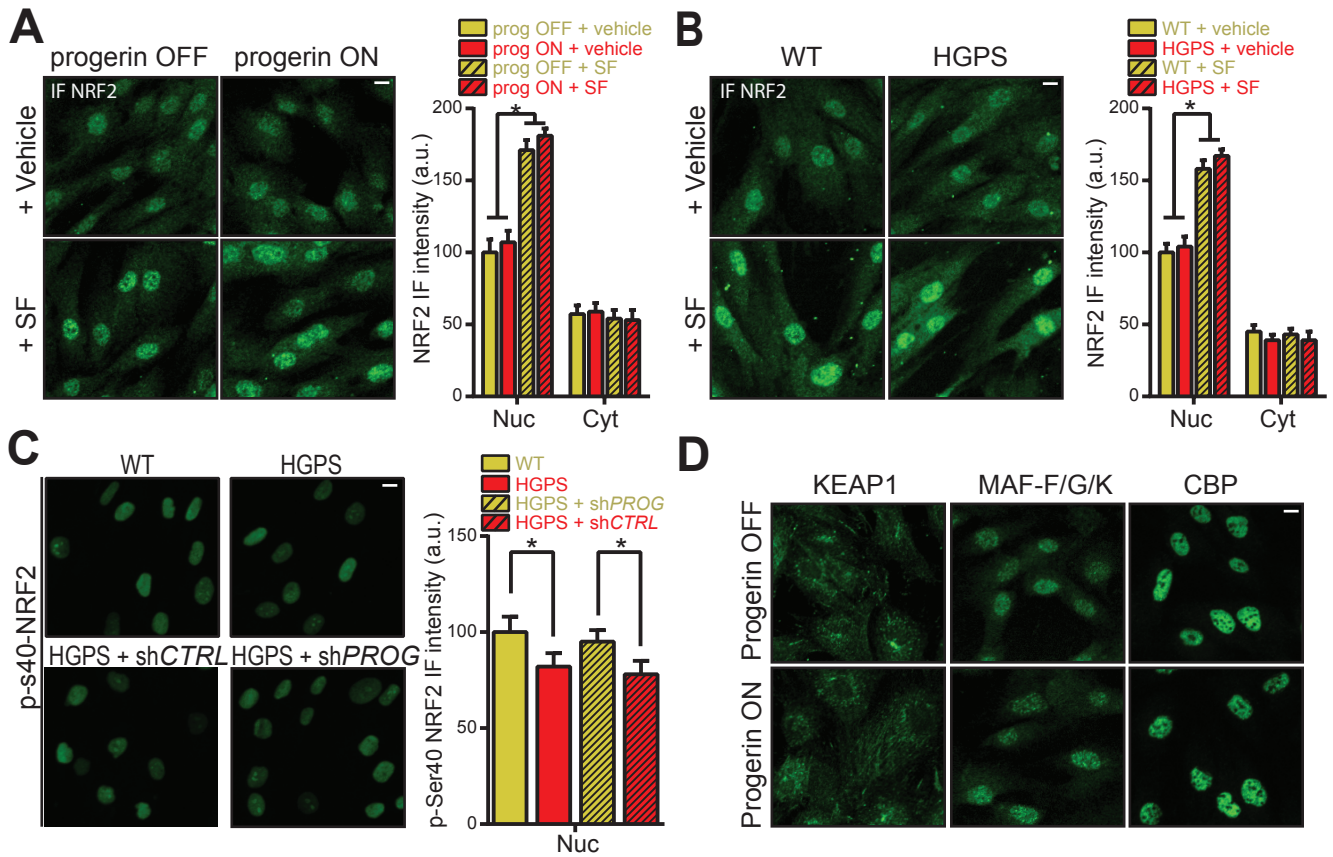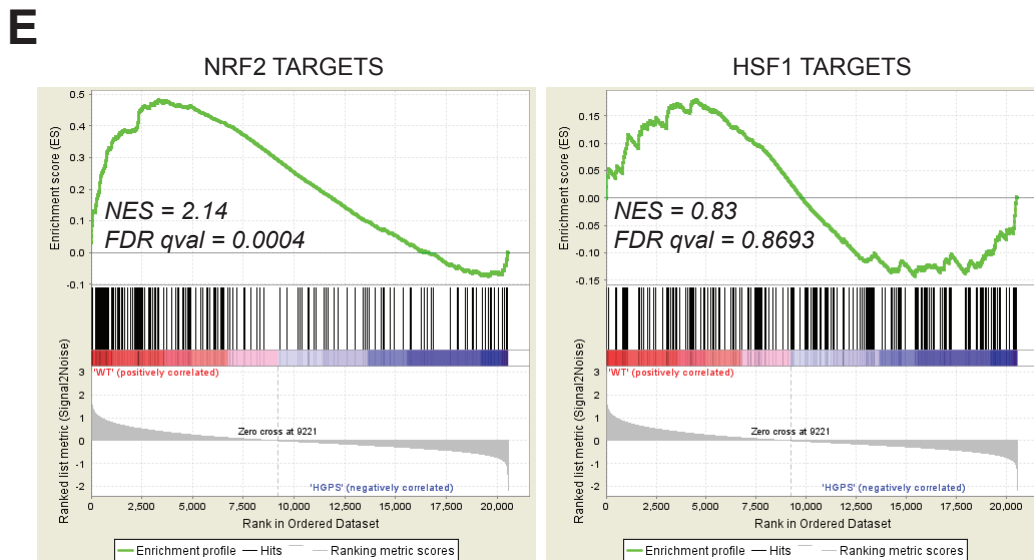

Supplement: NIHMS785613-supplement-2.pdf [file NIHMS785613-supplement-2.pdf]

Figure S3

**A**

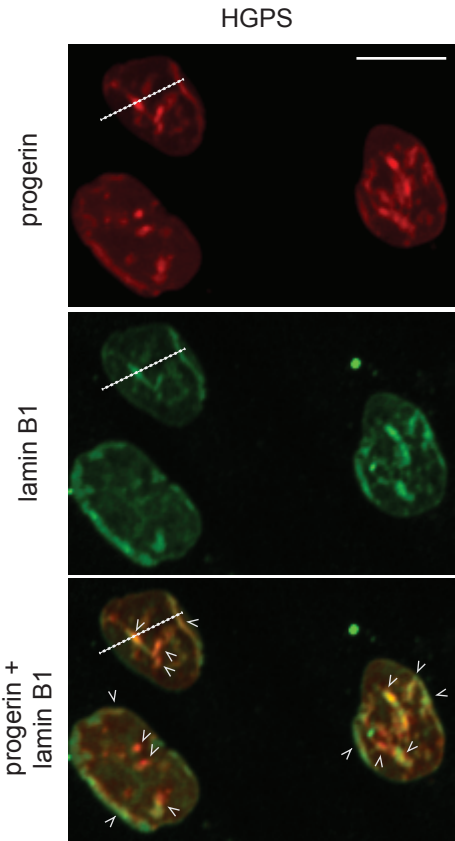

**B**

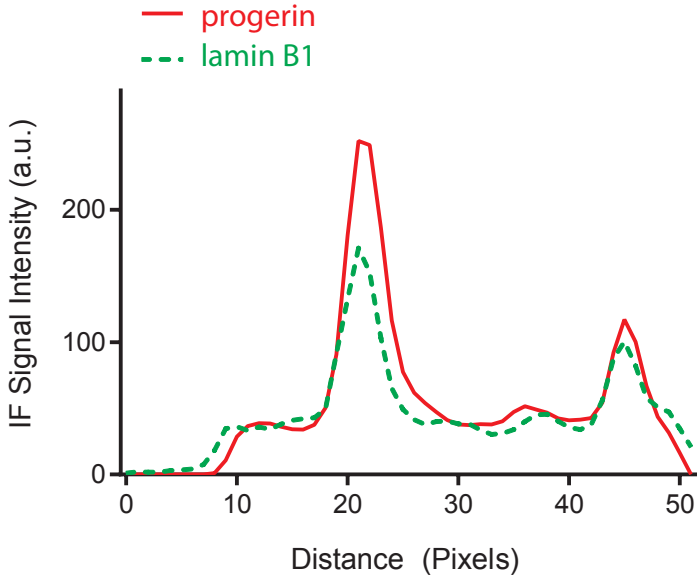

Supplement: NIHMS785613-supplement-3.pdf [file NIHMS785613-supplement-3.pdf]

# Figure S4

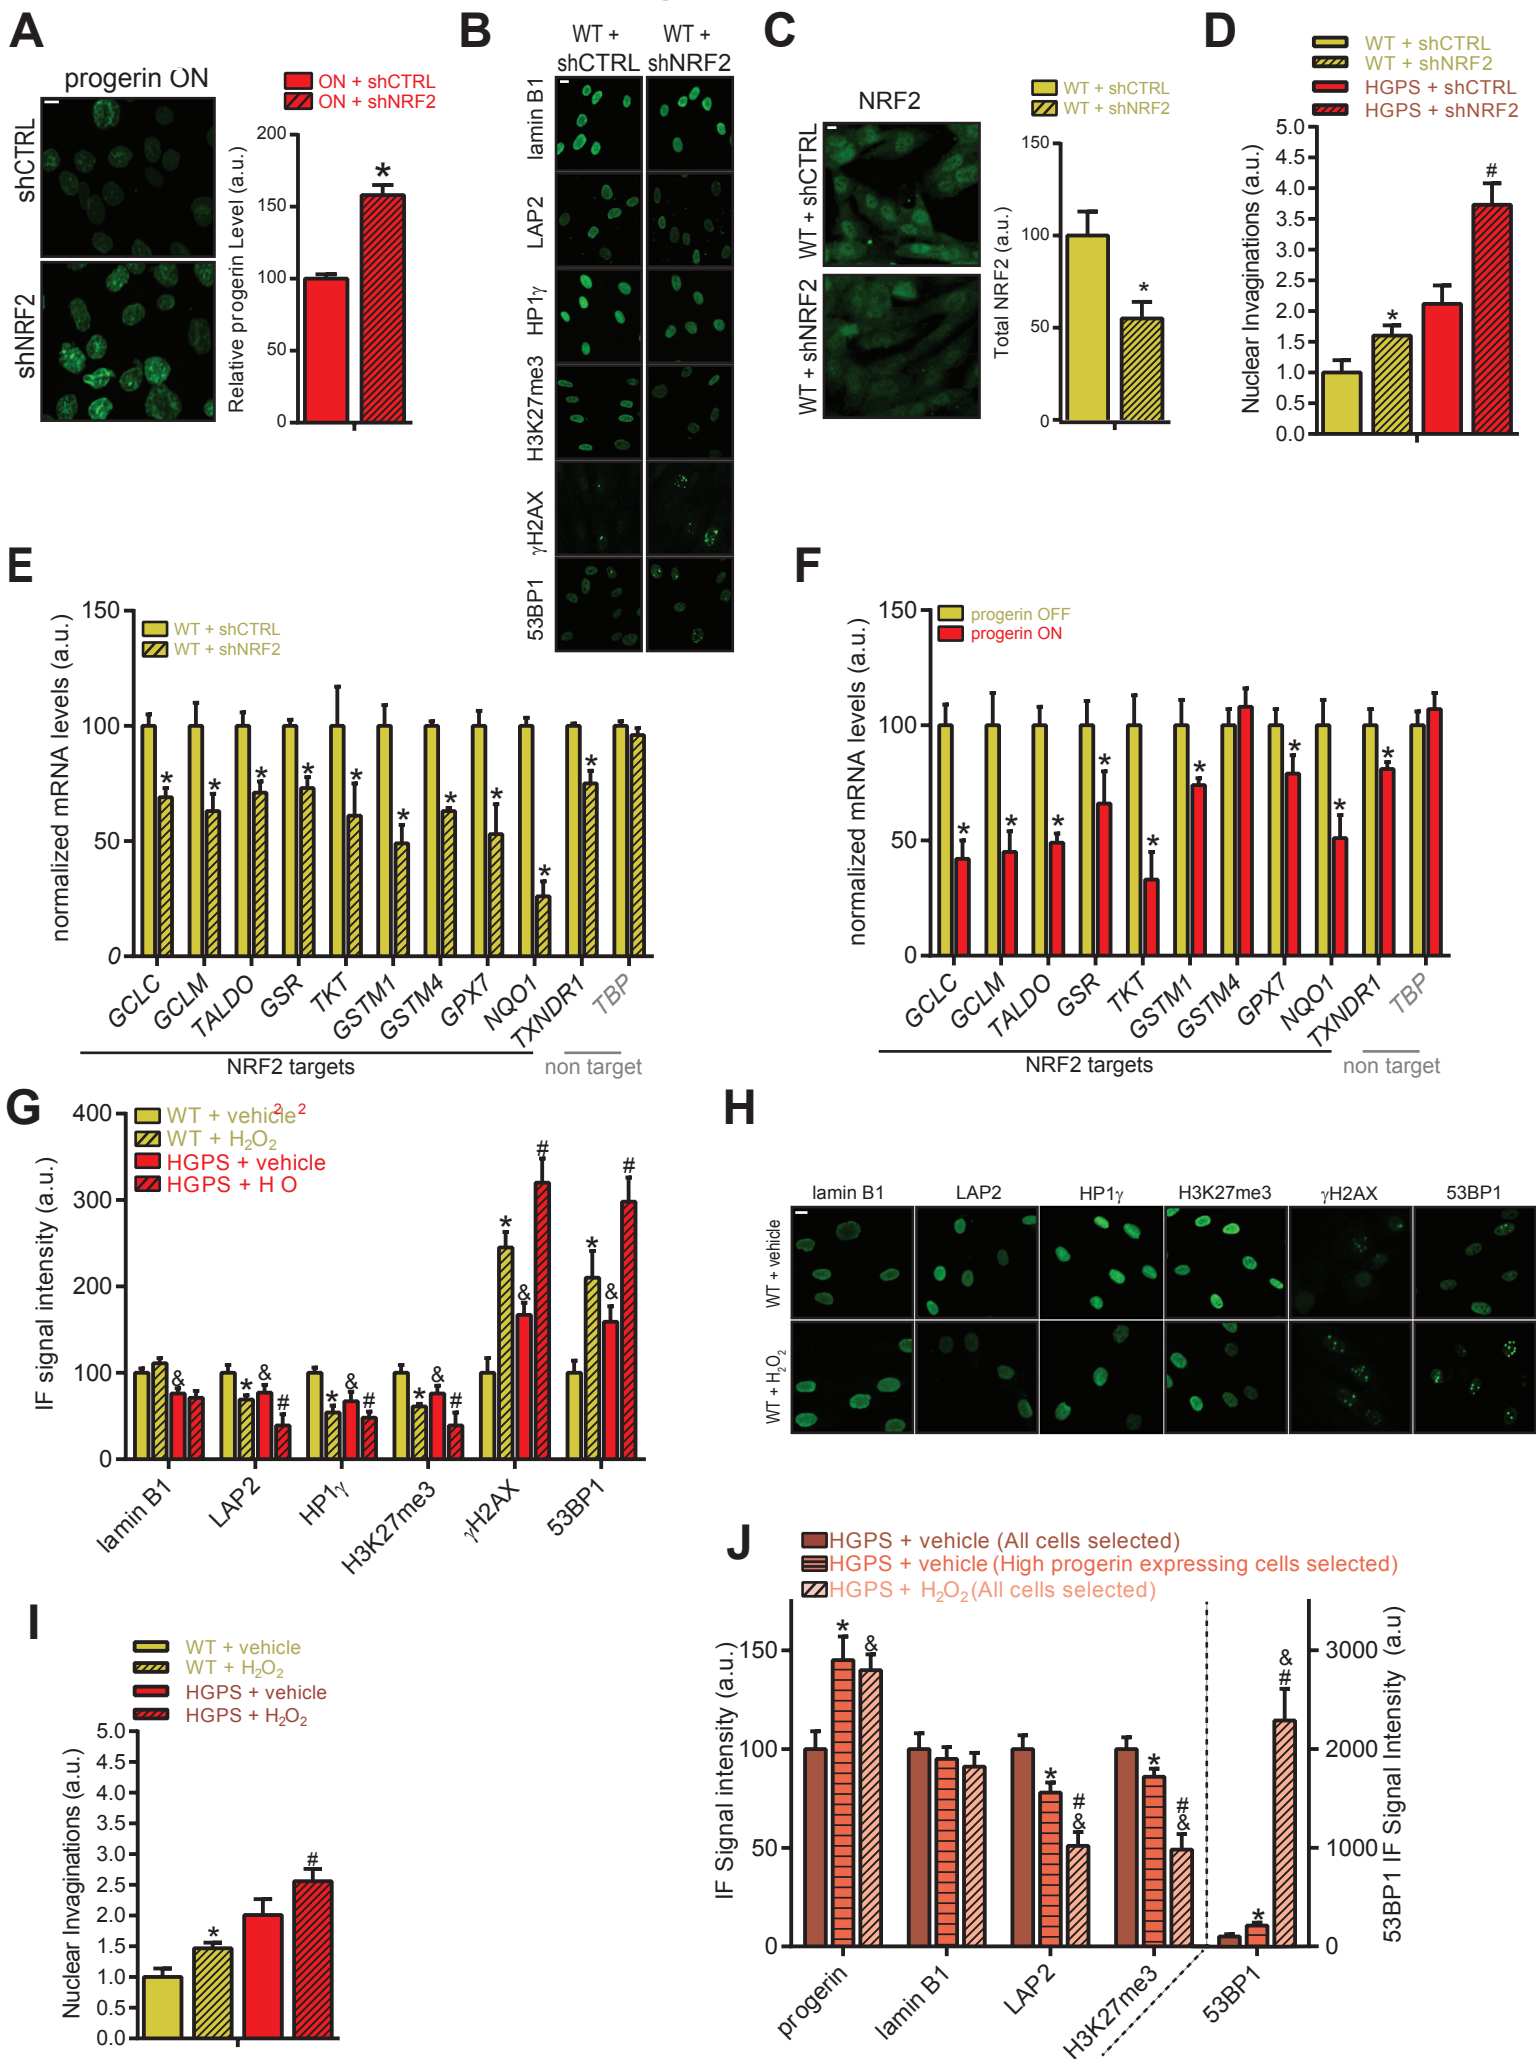

Supplement: NIHMS785613-supplement-4.pdf [file NIHMS785613-supplement-4.pdf]

# Figure S5

**A**

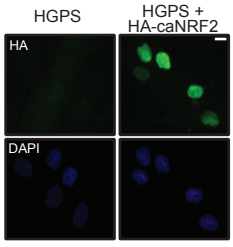

**B**

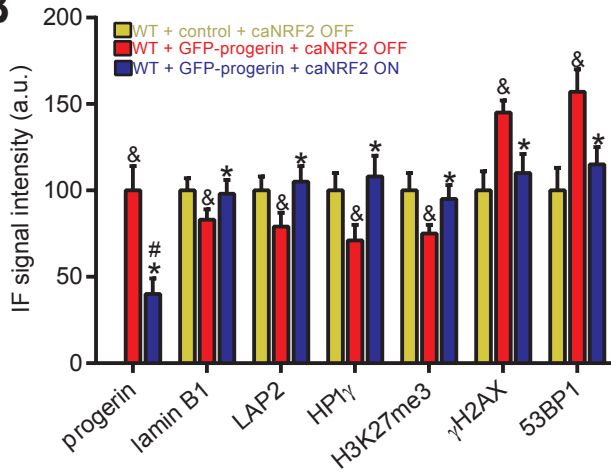

**C**

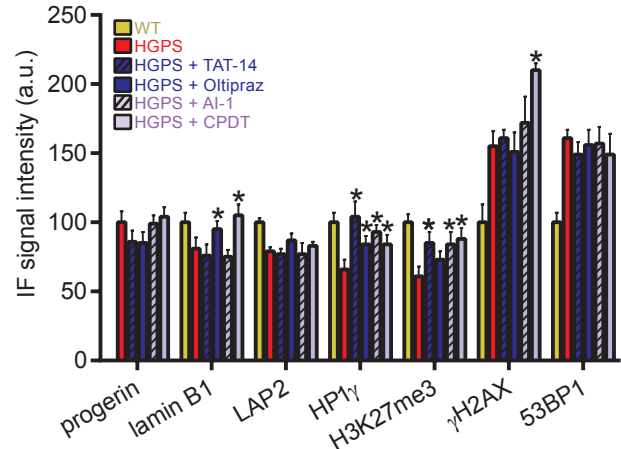

**D**

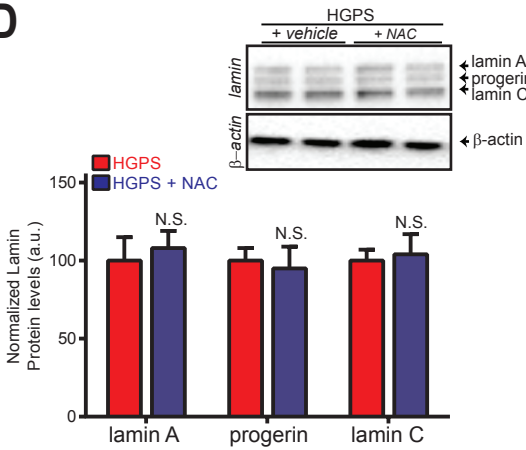

**E**

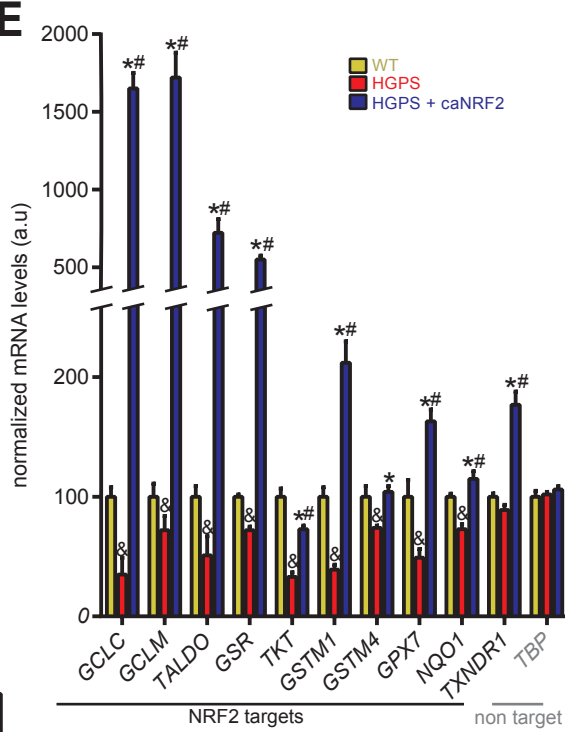

**F**

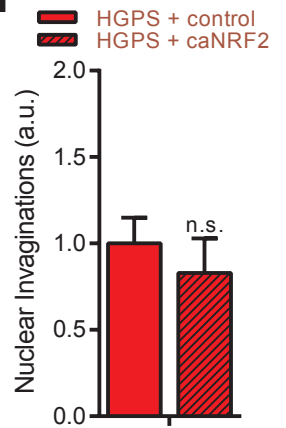

**G**

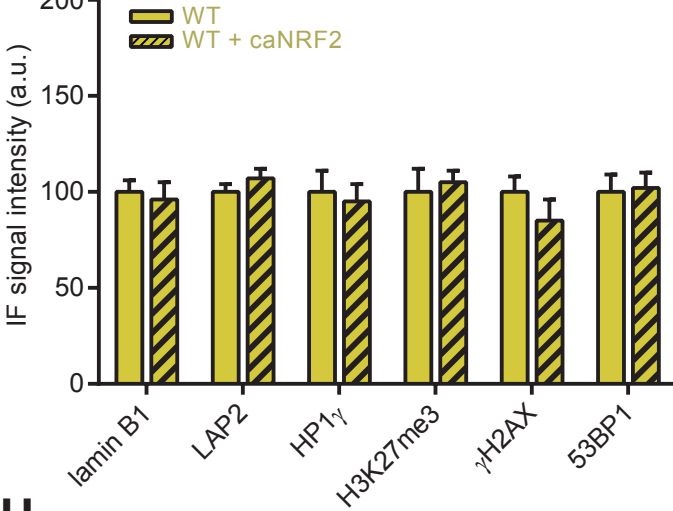

**H**

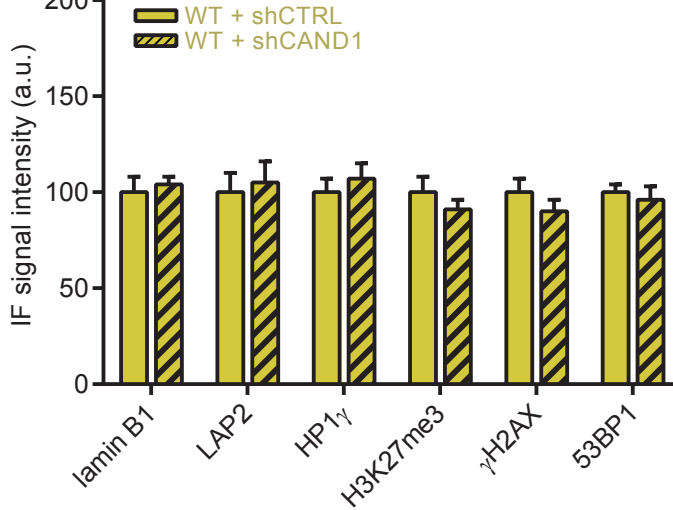

**I**

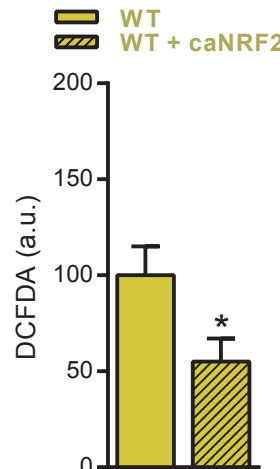

Supplement: NIHMS785613-supplement-5.pdf [file NIHMS785613-supplement-5.pdf]

# Figure S6

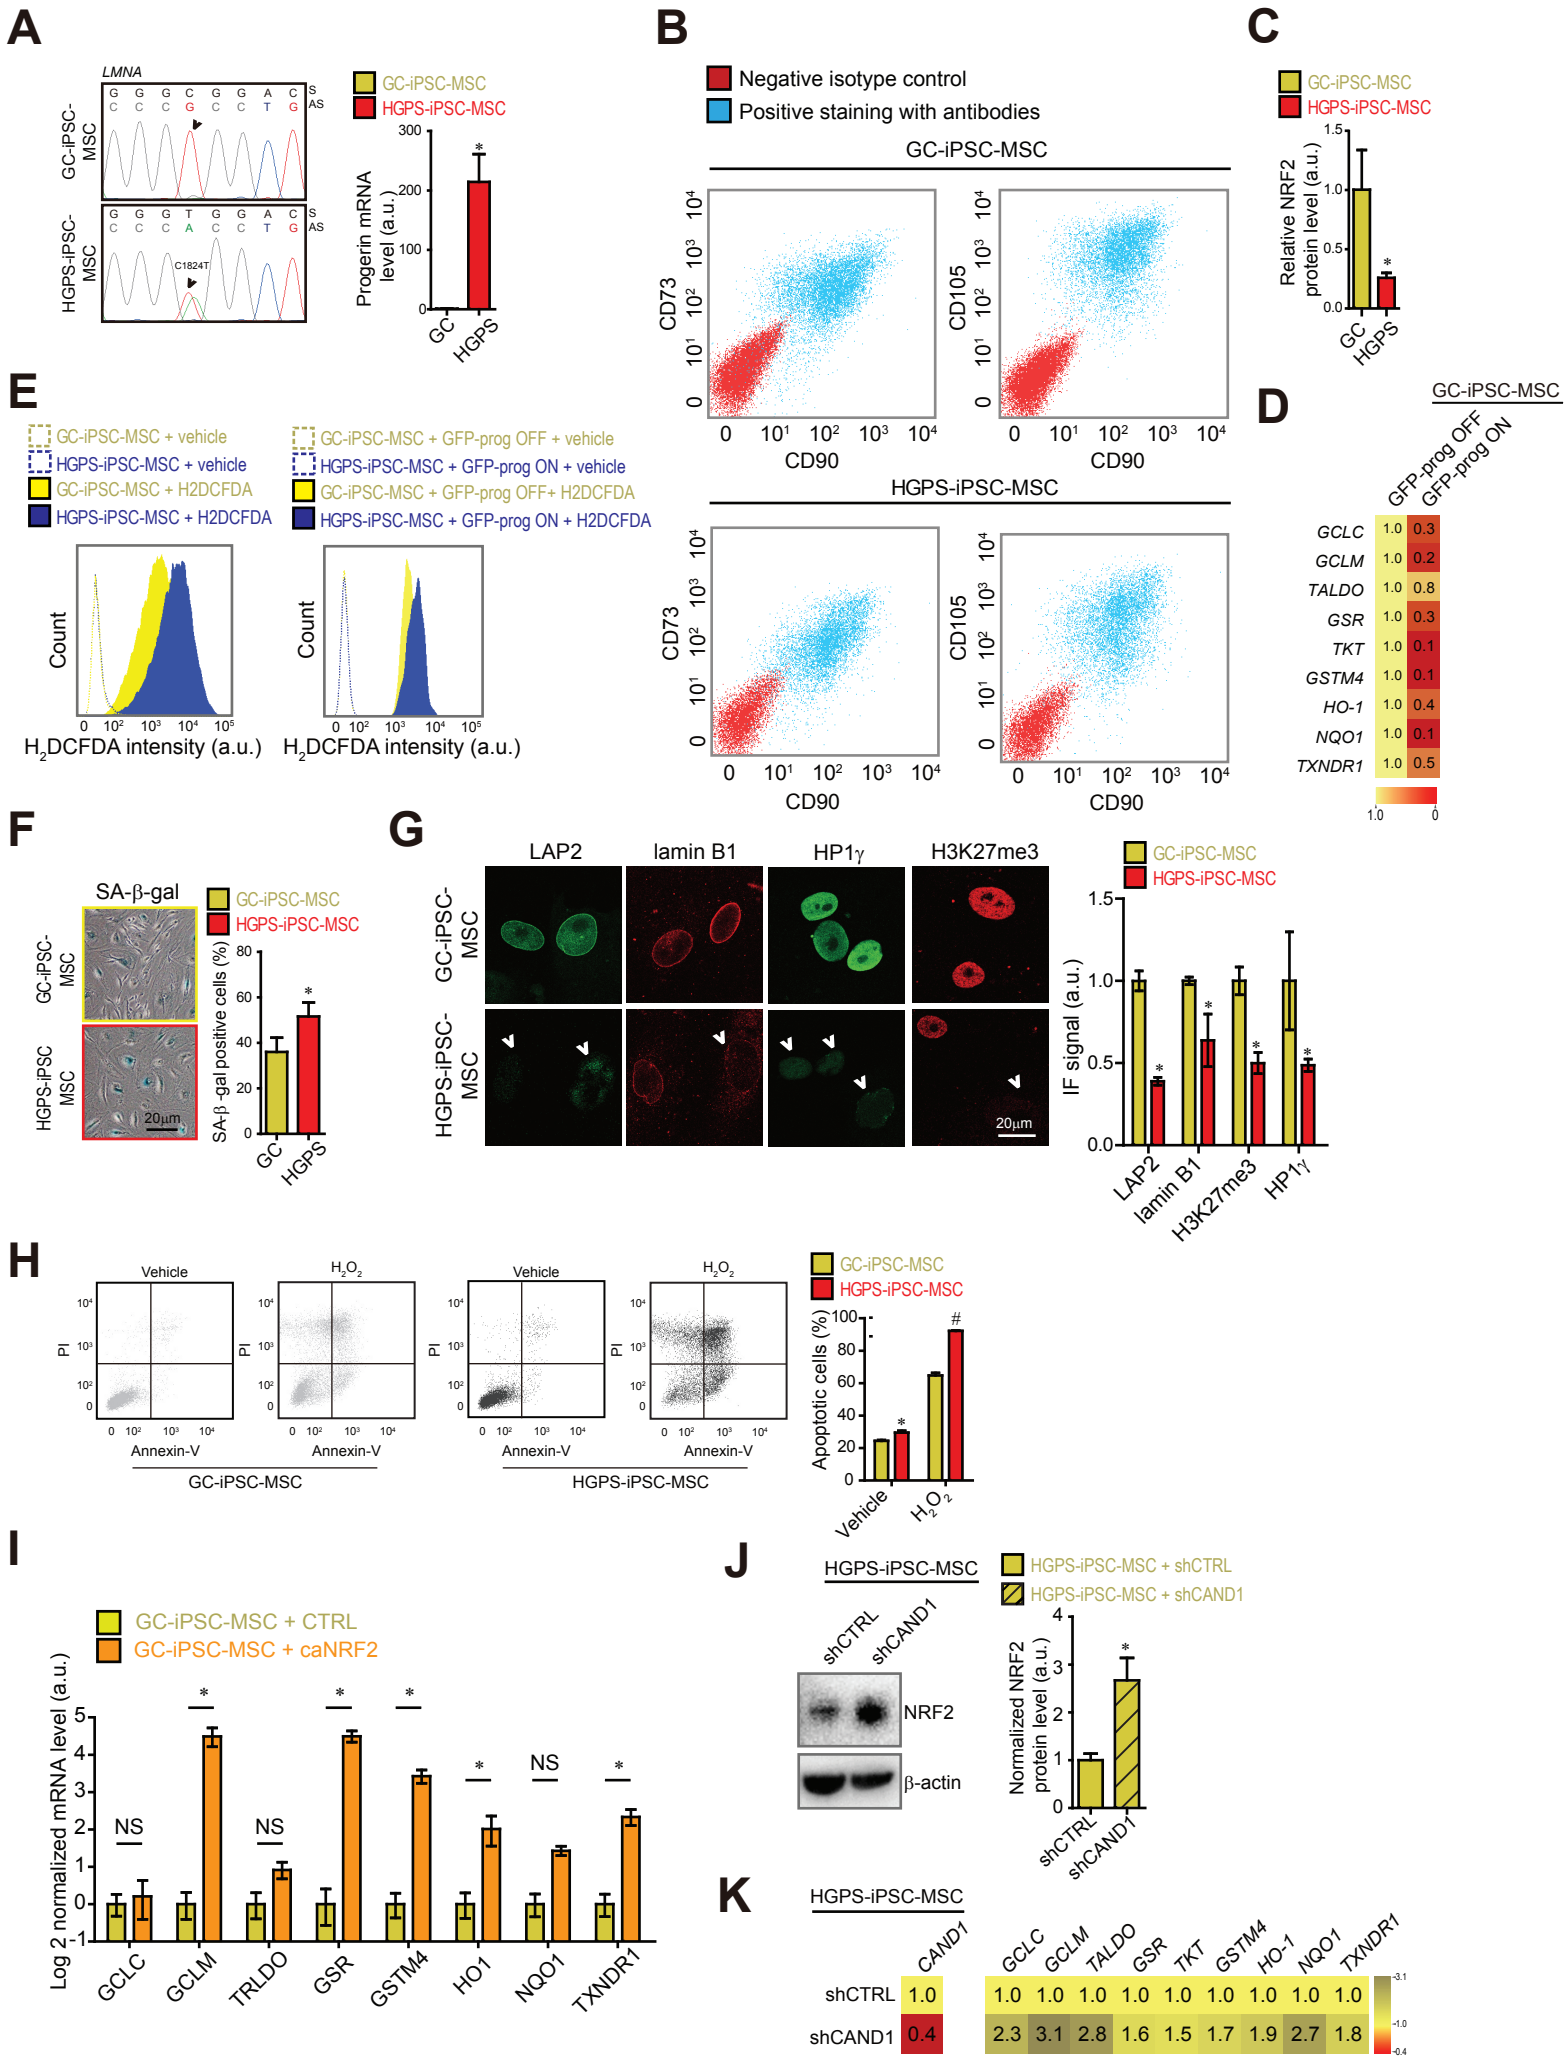

Supplement: NIHMS785613-supplement-6.pdf [file NIHMS785613-supplement-6.pdf]
